# Supplementary material
Source: HighWire-hosted journal article supplement (https://thorax.bmj.com/content/78/10/1035)
Supplement: inline-supplementary-material-1 [file inline-supplementary-material-1.pdf]

1 **Supplemental material: Understanding the effectiveness of different exercise training programme**  
2 **designs on  $\dot{V}O_{2peak}$  in COPD: a component network meta-analysis**

3

4 *Supplementary methods*

5 Exercise intensity was categorised into low, moderate and high intensity as detailed previously (very  
6 high intensity in our previous classification was combined into the high intensity group due to  
7 limited numbers) [1].

8

9 *Supplementary results*

10 Model 1 included 50 controlled trials involving 1899 participants. Of these, 19 were trials of aerobic  
11 training versus usual care or structured education in isolation, 28 were controlled trials in which  
12 both arms performed aerobic training in different forms or with different “add-ons”, and three  
13 studies had three arms (one compared aerobic training with aerobic training plus inspiratory muscle  
14 training versus usual care, one compared lower limb aerobic training with and without the addition  
15 of arm cycling versus usual care and one compared addition of either oxygen or helium hyperoxia  
16 compared to aerobic training in isolation).

17 Model 2 included 30 studies involving 1210 participants. Of these, 17 were trials of aerobic training  
18 versus usual care or structured education in isolation, 10 were controlled trials comparing different  
19 forms of aerobic training and three were studies with three arms comparing two different forms of  
20 aerobic training with usual care.

21 In model 1, lower limb aerobic training (SMD 0.56 95% CI 0.32;0.81, intervention arms = 86), non-  
22 invasive ventilation (NIV) during exercise (SMD 0.55 95% CI 0.04;1.06, intervention arms = 4) and  
23 administration of ghrelin alongside exercise training (SMD 1.13 95% CI 0.13;2.14, intervention arms =  
24 1) were the effective components at improving  $\dot{V}O_{2peak}$  (Figure 2). No other component resulted in  
25 significant improvement in  $\dot{V}O_{2peak}$ .

26 In model 2, moderate to high intensity continuous cycling and walking training modalities and high  
27 intensity interval walking and cycling resulted in improvements in  $\dot{V}O_{2peak}$  (all  $p < 0.05$ , Figure 3). There  
28 were non-significant improvements in  $\dot{V}O_{2peak}$  following water-based callisthenics (SMD 0.41 95% CI -  
29 0.26;1.09, intervention arms = 1) and land-based callisthenics (SMD 0.38 95% CI -0.03;0.78,  
30 intervention arms = 6). No improvements in  $\dot{V}O_{2peak}$  were seen following moderate intensity interval  
31 cycling however this was performed by one intervention group. Stair climbing (SMD -0.79 95% CI -  
32 1.28;-0.31, intervention arms = 4) and low intensity continuous walking (SMD -0.43 95% CI -0.83;-  
33 0.03, intervention arms = 2) appeared to have a detrimental effect on improvements in  $\dot{V}O_{2peak}$ .  
34 Whilst high intensity training modalities resulted in the greatest increase in  $\dot{V}O_{2peak}$ , the differences  
35 compared to moderate intensity training were not significant.

36 For model 1, a sensitivity analysis removing two unconnected studies did not significantly change the  
37 results except eccentric cycling was removed from the model. Results did not change significantly  
38 after removing two unconnected studies for model 2. Node splitting and examination of net heat  
39 plots did not identify significant inconsistency between direct and indirect evidence for model 1 or 2  
40 although the number of pairwise comparisons were low.

41 When limiting analysis to RCTs with low risk of bias for blinding of outcome assessors, 22 studies  
42 remained in model 1 with aerobic training the only component with a significant impact on change

43 in  $\dot{V}O_{2peak}$  (SMD 0.97 95%CI 0.12:1.82) and nine studies remained in model 2 with high intensity  
44 continuous walking and high intensity continuous cycling the only components with a significant  
45 impact on change in  $\dot{V}O_{2peak}$  (SMD 0.94 95%CI 0.02:1.86 and SMD 1.10 95%CI 0.31:1.88). When  
46 limiting analysis to studies with high quality of reporting (Consensus on Exercise Reporting Template  
47 score  $\geq 12$ ), 19 studies remained in model 1 with aerobic training and ghrelin the only components  
48 with significant impact on change in  $\dot{V}O_{2peak}$  (SMD 0.56 95%CI 0.13:0.99 and SMD 1.13 95%CI  
49 0.04:2.22) and 11 studies remained in model 2 with high intensity continuous cycling and high  
50 intensity interval walking the only components with a significant impact on change in  $\dot{V}O_{2peak}$  (SMD  
51 0.77 95%CI 0.31:1.22 and SMD 1.11 95%CI 0.03:2.19).

52 For model 1, when using a conservative estimate of the correlation coefficient, the effect of the  
53 addition of vitamin supplementation to lower limb aerobic training became significant (SMD 0.65  
54 95%CI 0.04:1.27) but the results were otherwise unchanged. Using a conservative estimate of the  
55 correlation coefficient did not affect the results of model 2.

56

## 57 References

- 58 1 Ward TJC, Plumptre CD, Dolmage TE, *et al.* Change in  $\dot{V}O_{2peak}$  in Response to Aerobic  
59 Exercise Training and the Relationship With Exercise Prescription in People With COPD: A  
60 Systematic Review and Meta-analysis. *Chest* 2020;**158**:131–44.  
61 doi:10.1016/j.chest.2020.01.053
- 62 2 Baumann HJ, Kluge S, Rummel K, *et al.* Low intensity, long-term outpatient rehabilitation in  
63 COPD: a randomised controlled trial. *Respir Res* 2012;**13**:86. doi:10.1186/1465-9921-13-86
- 64 3 Borghi-Silva A, Arena R, Castello V, *et al.* Aerobic exercise training improves autonomic  
65 nervous control in patients with COPD. *Respir Med* 2009;**103**:1503–10.  
66 doi:10.1016/j.rmed.2009.04.015
- 67 4 Borghi-Silva A, Mendes RG, Trimer R, *et al.* Potential effect of 6 versus 12-weeks of physical  
68 training on cardiac autonomic function and exercise capacity in chronic obstructive  
69 pulmonary disease. *Eur J Phys Rehabil Med* 2015;**51**:211–21.
- 70 5 Duruturk N, Arikan H, Ulubay G, *et al.* A comparison of calisthenic and cycle exercise training  
71 in chronic obstructive pulmonary disease patients: A randomized controlled trial. *Expert Rev*  
72 *Respir Med* 2016;**10**:99–108. doi:10.1586/17476348.2015.1126419
- 73 6 Emery CF, Schein RL, Hauck ER, *et al.* Psychological and cognitive outcomes of a randomized  
74 trial of exercise among patients with chronic obstructive pulmonary disease. *Heal Psychol*  
75 1998;**17**:232–40. doi:10.1037//0278-6133.17.3.232
- 76 7 Göhl O, Linz H, Schönleben T, *et al.* Effekte eines multimodularen ambulanten  
77 trainingsprogramms für patienten mit COPD. *Pneumologie* 2006;**60**:529–36. doi:10.1055/s-  
78 2006-944235
- 79 8 Lake FR, Henderson K, Briffa T, *et al.* Upper-limb and lower-limb exercise training in patients  
80 with chronic airflow obstruction. *Chest* 1990;**97**:1077–82. doi:10.1378/chest.97.5.1077
- 81 9 Larson JL, Covey MK, Wirtz SE, *et al.* Cycle ergometer and inspiratory muscle training in  
82 chronic obstructive pulmonary disease. *Am J Respir Crit Care Med* 1999;**160**:500–7.  
83 doi:10.1164/ajrccm.160.2.9804067
- 84 10 Reardon J, Awad E, Normandin E, *et al.* The effect of comprehensive outpatient pulmonary  
85 rehabilitation on dyspnea. *Chest* 1994;**105**:1046–52. doi:10.1378/chest.105.4.1046

- 86 11 Ries AL, Kaplan RM, Limberg TM, *et al.* Effects of Pulmonary Rehabilitation on Physiologic and  
87 Psychosocial Outcomes in Patients with Chronic Obstructive Pulmonary Disease. *Ann Intern*  
88 *Med* 1995;**122**:956–64. doi:10.7326/0003-4819-122-11-199506010-00003
- 89 12 Troosters T, Gosselink R, Decramer M. Short- and long-term effects of outpatient  
90 rehabilitation in patients with chronic obstructive pulmonary disease: a randomized trial. *Am*  
91 *J Med* 2000;**109**:207–12. doi:10.1016/S0002-9343(00)00472-1
- 92 13 Wijkstra PJ, van der Mark TW, Kraan J, *et al.* Long-term effects of home rehabilitation on  
93 physical performance in chronic obstructive pulmonary disease. *Am J Respir Crit Care Med*  
94 1996;**153**:1234–41. doi:10.1164/ajrccm.153.4.8616547
- 95 14 Zambom-Ferraresi F, Cebollero P, Gorostiaga EM, *et al.* Effects of Combined Resistance and  
96 Endurance Training Versus Resistance Training Alone on Strength, Exercise Capacity, and  
97 Quality of Life in Patients With COPD. *J Cardiopulm Rehabil Prev* 2015;**35**:446–53.  
98 doi:10.1097/HCR.0000000000000132
- 99 15 Covey MK, Collins EG, Reynertson SI, *et al.* Resistance training as a preconditioning strategy  
100 for enhancing aerobic exercise training outcomes in COPD. *Respir Med* 2014;**108**:1141–52.  
101 doi:10.1016/j.rmed.2014.06.001
- 102 16 Gigliotti F, Coli C, Bianchi R, *et al.* Exercise training improves exertional dyspnea in patients  
103 with COPD: evidence of the role of mechanical factors. *Chest* 2003;**123**:1794–  
104 802.<http://www.ncbi.nlm.nih.gov/pubmed/12796152> (accessed 29 Oct 2018).
- 105 17 Leite MR, Ramos EMC, Kalva-Filho CA, *et al.* Effects of 12 weeks of aerobic training on  
106 autonomic modulation, mucociliary clearance, and aerobic parameters in patients with  
107 COPD. *Int J COPD* 2015;**10**:2549–57. doi:10.2147/COPD.S81363
- 108 18 O'Donnell DE, McGuire M, Samis L, *et al.* The impact of exercise reconditioning on  
109 breathlessness in severe chronic airflow limitation. *Am J Respir Crit Care Med* 1995;**152**:2005–  
110 13. doi:10.1164/ajrccm.152.6.8520769
- 111 19 Serres I, Varray A, Vallet G, *et al.* Improved skeletal muscle performance after individualized  
112 exercise training in patients with chronic obstructive pulmonary disease. *J Cardiopulm Rehabil*  
113 1997;**17**:232–8. doi:10.1097/00008483-199707000-00003
- 114 20 Vogiatzis I, Williamson AF, Miles J, *et al.* Physiological response to moderate exercise  
115 workloads in a pulmonary rehabilitation program in patients with varying degrees of airflow  
116 obstruction. *Chest* 1999;**116**:1200–7. doi:10.1378/chest.116.5.1200
- 117 21 Wen H, Gao Y, An J-Y. [Comparison of high-intensity and anaerobic threshold programs in  
118 rehabilitation for patients with moderate to severe chronic obstructive pulmonary disease].  
119 *Zhonghua Jie He He Hu Xi Za Zhi* 2008;**31**:571–  
120 6.<http://www.ncbi.nlm.nih.gov/pubmed/19080398> (accessed 29 Oct 2018).
- 121 22 Wadell K, Sundelin G, Henriksson-Larsen K, *et al.* High intensity physical group training in  
122 water--an effective training modality for patients with COPD. *Respir Med* 2004;**98**:428–38.
- 123 23 Bernard S, Whittom F, Leblanc P, *et al.* Aerobic and strength training in patients with chronic  
124 obstructive pulmonary disease. *Am J Respir Crit Care Med* 1999;**159**:896–901.  
125 doi:10.1164/ajrccm.159.3.9807034
- 126 24 Bianchi L, Foglio K, Porta R, *et al.* Lack of additional effect of adjunct of assisted ventilation to  
127 pulmonary rehabilitation in mild COPD patients. *Respir Med* 2002;**96**:359–67.  
128 doi:10.1053/rmed.2001.1287

- 129 25 Blanco I, Santos S, Gea J, *et al.* Sildenafil to improve respiratory rehabilitation outcomes in  
130 COPD: a controlled trial. *Eur Respir J* 2013;**42**:982–92. doi:10.1183/09031936.00176312
- 131 26 Borghi-Silva A, Mendes RGG, Toledo AC, *et al.* Adjuncts to physical training of patients with  
132 severe COPD: oxygen or noninvasive ventilation? *Respir Care* 2010;**55**:885–94.  
133 doi:10.1016/S0002-8703(03)00499-X
- 134 27 Broekhuizen R, Wouters EFM, Creutzberg EC, *et al.* Polyunsaturated fatty acids improve  
135 exercise capacity in chronic obstructive pulmonary disease. *Thorax* 2005;**60**:376–82.  
136 doi:10.1136/thx.2004.030858
- 137 28 Brønstad E, Tjonaa AE, Rognmo Ø, *et al.* Aerobic exercise training improves right- and left  
138 ventricular systolic function in patients with COPD. *COPD J Chronic Obstr Pulm Dis*  
139 2013;**10**:300–6. doi:10.3109/15412555.2012.745843
- 140 29 Burdet L, de Muralt B, Schutz Y, *et al.* Administration of growth hormone to underweight  
141 patients with chronic obstructive pulmonary disease: A prospective, randomized, controlled  
142 study. *Am J Respir Crit Care Med* 1997;**156**:1800–6. doi:10.1164/ajrccm.156.6.9704142
- 143 30 Carrieri-Kohlman V, Gormley JM, Douglas MK, *et al.* Exercise training decreases dyspnea and  
144 the distress and anxiety associated with it. Monitoring alone may be as effective as coaching.  
145 *Chest* 1996;**110**:1526–35.
- 146 31 Costes F, Agresti A, Court-Fortune I, *et al.* Noninvasive ventilation during exercise training  
147 improves exercise tolerance in patients with chronic obstructive pulmonary disease. *J*  
148 *Cardiopulm Rehabil* 2003;**23**:307–13. doi:10.1097/00008483-200307000-00008
- 149 32 Creutzberg EC, Wouters EFM, Mostert R, *et al.* A role for anabolic steroids in the  
150 rehabilitation of patients with COPD? A double-blind, placebo-controlled, randomized trial.  
151 *Chest* 2003;**124**:1733–42. <http://www.ncbi.nlm.nih.gov/pubmed/14605042> (accessed 4 Jan  
152 2017).
- 153 33 Coppoolse R, Schols AM, Baarends EM, *et al.* Interval versus continuous training in patients  
154 with severe COPD: a randomized clinical trial. *Eur Respir J* 1999;**14**:258–63.
- 155 34 Dekhuijzen PNR, Folgering HTM, van Herwaarden CLA. Target-flow inspiratory muscle training  
156 during pulmonary rehabilitation in patients with COPD. *Chest* 1991;**99**:128–33.  
157 doi:10.1378/chest.99.1.128
- 158 35 Delussu AS, Laudisio A, Pedone C, *et al.* Effects of two adapted physical activity training  
159 programs on pulmonary functionality and exercise capacity in patients affected by chronic  
160 obstructive pulmonary disease. *Thorax*. 2014;**69**:A66–  
161 7. [http://thorax.bmj.com/content/69/Suppl\\_2/A66.2.short](http://thorax.bmj.com/content/69/Suppl_2/A66.2.short) (accessed 29 Oct 2018).
- 162 36 Emtner M, Porszasz J, Burns M, *et al.* Benefits of supplemental oxygen in exercise training in  
163 nonhypoxemic chronic obstructive pulmonary disease patients. *Am J Respir Crit Care Med*  
164 2003;**168**:1034–42. doi:10.1164/rccm.200212-1525OC
- 165 37 Eves ND, Sandmeyer LC, Wong EY, *et al.* Helium-hyperoxia: a novel intervention to improve  
166 the benefits of pulmonary rehabilitation for patients with COPD. *Chest* 2009;**135**:609–18.  
167 doi:10.1378/chest.08-1517
- 168 38 Ferreira IM, Verreschi IT, Nery LE, *et al.* The influence of 6 months of oral anabolic steroids on  
169 body mass and respiratory muscles in undernourished COPD patients. *Chest* 1998;**114**:19–28.
- 170 39 Fichter J, Fleckenstein J, Stahl C, *et al.* Einfluss von Sauerstoff (FI02: 0.35) auf die aerobe  
171 Belastbarkeit bei Patienten mit COPD. *Pneumologie* 1999;**53**:121–

- 172 6. [https://scholar.google.co.uk/scholar?hl=en&as\\_sdt=0%2C5&q=Einfluss+von+Sauerstoff+%28F%28IO2%29%3A+0.35%5D+auf+die+aerobe+Belastbarkeit+bei+Patienten+mit+COPDInfluence+of+oxygen+%28F%28IO2%29%3A+0.35%29+on+the+exercise+capacity+in+patients+with+COPD&btnG=](https://scholar.google.co.uk/scholar?hl=en&as_sdt=0%2C5&q=Einfluss+von+Sauerstoff+%28F%28IO2%29%3A+0.35%5D+auf+die+aerobe+Belastbarkeit+bei+Patienten+mit+COPDInfluence+of+oxygen+%28F%28IO2%29%3A+0.35%29+on+the+exercise+capacity+in+patients+with+COPD&btnG=) (accessed 29 Oct 2018).
- 173
- 174
- 175
- 176 40 Fuld JP, Kilduff LP, Neder JA, *et al.* Creatine supplementation during pulmonary rehabilitation in chronic obstructive pulmonary disease. *Thorax* 2005;**60**:531–7. doi:10.1136/thx.2004.030452
- 177
- 178
- 179 41 Hornikx M, Van Remoortel H, Lehouck A, *et al.* Vitamin D supplementation during rehabilitation in COPD: a secondary analysis of a randomized trial. *Respir Res* 2012;**13**:1–9. doi:10.1186/1465-9921-13-84
- 180
- 181
- 182 42 Mador MJ, Deniz O, Aggarwal A, *et al.* Effect of respiratory muscle endurance training in patients with COPD undergoing pulmonary rehabilitation. *Chest* 2005;**128**:1216–24. doi:10.1378/chest.128.3.1216
- 183
- 184
- 185 43 Mador MJ, Krawza M, Alhajhusian A, *et al.* Interval training versus continuous training in patients with chronic obstructive pulmonary disease. *J Cardiopulm Rehabil Prev* 2009;**29**:126–32. doi:10.1097/HCR.0b013e31819a024f
- 186
- 187
- 188 44 Miki K, Maekura R, Nagaya N, *et al.* Effects of ghrelin treatment on exercise capacity in underweight COPD patients: a substudy of a multicenter, randomized, double-blind, placebo-controlled trial of ghrelin treatment. *BMC Pulm Med* 2013;**13**:37. doi:10.1186/1471-2466-13-37
- 189
- 190
- 191
- 192 45 Normandin EA, McCusker C, Connors M, *et al.* An evaluation of two approaches to exercise conditioning in pulmonary rehabilitation. *Chest* 2002;**121**:1085–91.
- 193
- 194 46 Reuveny R, Ben-Dov I, Gaides M, *et al.* Ventilatory support during training improves training benefit in severe chronic airway obstruction. *Isr Med Assoc J* 2005;**7**:151–5. doi:10.1097/00008483-200507000-00013
- 195
- 196
- 197 47 Rodríguez DA, Arbillaga A, Barberan-Garcia A, *et al.* Effects of interval and continuous exercise training on autonomic cardiac function in COPD patients. *Clin Respir J* 2016;**10**:83–9. doi:10.1111/crj.12189
- 198
- 199
- 200 48 Rooyackers JM, Berkeljon DA, Folgering HTM. Eccentric exercise training in patients with chronic obstructive pulmonary disease. *Int J Rehabil Res* 2003;**26**:47–9. doi:10.1097/01.mrr.0000054807.81886.9e
- 201
- 202
- 203 49 Scorsone D, Bartolini S, Saporiti R, *et al.* Does a low-density gas mixture or oxygen supplementation improve exercise training in COPD? *Chest* 2010;**138**:1133–9. doi:10.1378/chest.10-0120
- 204
- 205
- 206 50 Sivori M, Rhodius E, Kaplan P, *et al.* Entrenamiento muscular en la enfermedad pulmonar obstructiva crónica severa. *Medicina (B Aires)* 1998;**58**:717–27. <http://www.medicinabuenosaires.com/revistas/vol58-98/n6/58-98n6-717-727.pdf> (accessed 30 Oct 2018).
- 207
- 208
- 209
- 210 51 Spielmanns M, Fuchs-Bergsma C, Winkler A, *et al.* Effects of Oxygen Supply During Training on Subjects With COPD Who Are Normoxemic at Rest and During Exercise: A Blinded Randomized Controlled Trial. *Respir Care* 2015;**60**:540–8. doi:10.4187/respcare.03647
- 211
- 212
- 213 52 Sykes K, Hang H. Inspiratory muscle training in the treatment of chronic obstructive pulmonary disease: randomized controlled trial. *Am J Recreat Ther* 2005;**4**:39–48.
- 214

- 215 53 Vallet G, Ahmaïdi S, Serres I, *et al.* Comparison of two training programmes in chronic airway  
216 limitation patients: Standardized versus individualized protocols. *Eur Respir J* 1997;**10**:114–  
217 22. doi:10.1183/09031936.97.10010114
- 218 54 Varga J, Porszasz J, Boda K, *et al.* Supervised high intensity continuous and interval training vs.  
219 self-paced training in COPD. *Respir Med* 2007;**101**:2297–304.  
220 doi:10.1016/j.rmed.2007.06.017
- 221 55 Vogiatzis I, Nanas S, Roussos C. Interval training as an alternative modality to continuous  
222 exercise in patients with COPD. *Eur Respir J* 2002;**20**:12–9.
- 223 56 Vogiatzis I, Terzis G, Nanas S, *et al.* Skeletal muscle adaptations to interval training in patients  
224 with advanced COPD. *Chest* 2005;**128**:3838–45. doi:10.1378/chest.128.6.3838
- 225 57 Vonbank K, Strasser B, Mondrzyk J, *et al.* Strength training increases maximum working  
226 capacity in patients with COPD--randomized clinical trial comparing three training modalities.  
227 *Respir Med* 2012;**106**:557–63. doi:10.1016/j.rmed.2011.11.005
- 228 58 Wang K, Zeng GQ, Li R, *et al.* Cycle ergometer and inspiratory muscle training offer modest  
229 benefit compared with cycle ergometer alone: A comprehensive assessment in stable COPD  
230 patients. *Int J COPD* 2017;**12**:2655–68. doi:10.2147/COPD.S140093
- 231 59 Wanke T, Formanek D, Lahrmann H, *et al.* Effects of combined inspiratory muscle and cycle  
232 ergometer training on exercise performance in patients with COPD. *Eur Respir J* 1994;**7**:2205–  
233 11. doi:10.1183/09031936.94.07122205
- 234

235 **eTable 1** - Description of included controlled trials

| Study                       | Group 1 components                                                              | Group 2 components | Group 3 components        | Group 1 |         |              |                          | Group 2 |         |              |                          | Group 3 |        |              |                          |
|-----------------------------|---------------------------------------------------------------------------------|--------------------|---------------------------|---------|---------|--------------|--------------------------|---------|---------|--------------|--------------------------|---------|--------|--------------|--------------------------|
|                             |                                                                                 |                    |                           | n       | Age     | Gender (M:F) | FEV <sub>1</sub> (%pred) | n       | Age     | Gender (M:F) | FEV <sub>1</sub> (%pred) | n       | Age    | Gender (M:F) | FEV <sub>1</sub> (%pred) |
| Baumann, 2012 [2]           | HIIW + Callisthenics + stair climbing + ULRT + Education + Breathing retraining | Usual care         |                           | 37      | 63 (11) | 23:14        | 47 (13)                  | 44      | 65 (8)  | 24:20        | 45 (13)                  |         |        |              |                          |
| Borgh-Silva, 2009 [3]       | HICW                                                                            | Usual care         |                           | 20      | 67 (10) | 13:7         | 33 (9)                   | 14      | 67 (10) | 12:8         | 35 (11)                  |         |        |              |                          |
| Borgh-Silva, 2015 [4]       | HICW                                                                            | Usual care         |                           | 10      | 67 (7)  | 7:3          | 32 (11)                  | 10      | 66 (10) | 5:5          | 35 (12)                  |         |        |              |                          |
| Duruturk, 2016 [5]          | HICC + Education                                                                | Usual care         | Callisthenics + Education | 15      | 61 (5)  | 11:4         | 58 (14)                  | 13      | 64 (6)  | 11:2         | 64 (11)                  | 14      | 61 (5) | 13:1         | 57(10)                   |
| Emery, 1998 [6]             | MICC + MICW + Education + arm cycling                                           | Usual care         |                           | 25      | 65 (6)  | 15:15        | 43(18)                   | 25      | 67 (7)  | 12:13        | 39 (16)                  |         |        |              |                          |
| Gohl, 2006 [7]              | MICC + MICW + ULRT+ LLRT + Education                                            | Usual care         |                           | 19      | 63 (7)  | 6:4          | 53 (11)                  | 9       | 63 (9)  | 7:2          | 54 (6)                   |         |        |              |                          |
| Lake, 1990 [8]              | MICW                                                                            | Usual care         | MICW + arm cycling        | 6       | 72 (3)  | 6:0          |                          | 7       | 66 (4)  | 6:1          |                          | 7       | 66 (7) | 4:3          |                          |
| Larson, 1999 [9]            | MICC                                                                            | Usual care         | MICC + IMT                | 14      | 66 (6)  |              | 46 (17)                  | 12      | 62 (7)  |              | 55 (18)                  | 14      | 68 (6) |              | 46 (17)                  |
| Reardon, 1994 [10]          | MICC + MICW + stair climbing + ULRT + Education + IMT + Breathing retraining    | Usual care         |                           | 10      | 66 (8)  | 5:5          | 35 (10)                  | 10      | 66 (7)  | 5:5          | 33 (15)                  |         |        |              |                          |
| Ries, 1995 [11]             | MICW + ULRT + Education + Breathing retraining + arm cycling                    | Education          |                           | 53      | 61. (8) | 42:15        |                          | 57      | 64 (6)  | 45:17        |                          |         |        |              |                          |
| Troosters, 2000 [12]        | HICC + HICW + stair climbing + ULRT + LLRT + arm cycling                        | Usual care         |                           | 34      | 60 (9)  | 31:6         | 41 (16)                  | 28      | 63 (7)  | 30:3         | 43 (12)                  |         |        |              |                          |
| Wijkstra, 1996 [13]         | HICC + ULRT + Education + IMT + Breathing retraining                            | Usual care         |                           | 28      | 64 (5)  | 23:5         | 44 (11)                  | 15      | 62 (5)  | 14:1         | 45 (9)                   |         |        |              |                          |
| Zambom-Ferraresi, 2015 [14] | MICC + ULRT + LLRT                                                              | Usual care         |                           | 14      | 68 (7)  | 14:0         | 44 (12)                  | 8       | 69 (5)  | 8:0          | 40 (5)                   |         |        |              |                          |



|                                        |                                                                   |                                      |                           |    |                |       |                |    |                  |       |                |    |        |      |         |
|----------------------------------------|-------------------------------------------------------------------|--------------------------------------|---------------------------|----|----------------|-------|----------------|----|------------------|-------|----------------|----|--------|------|---------|
| Covey, 2014 [15]                       | HIIC                                                              | HIIC + LLRT                          |                           | 27 | 68 (7)         | 25:2  | 39 (9)         | 28 | 68 (8)           | 24:4  | 41 (10)        |    |        |      |         |
| Gigliotti, 2003 [16] (crossover study) | HICC + ULRT + Education                                           | Usual care                           |                           | 20 | 64 (8)         | 18:2  | 42 (12)        |    |                  |       |                |    |        |      |         |
| Leite, 2015 [17]                       | HIIW                                                              | Usual care                           |                           | 10 | 62 (IQR 60-69) |       | 55 (IQR 39-70) | 6  | 62.5 (IQR 57-71) |       | 45 (IQR 38-74) |    |        |      |         |
| O'Donnell, 1995 [18]                   | HICC + HICW + stair climbing + Breathing retraining + arm cycling | Usual care                           |                           | 30 | 66 (6)         | 20:10 | 38             | 30 | 69 (6)           | 23:7  | 38             |    |        |      |         |
| Serres, 1997 [19]                      | HIIC + MICW                                                       | Usual care                           |                           | 8  | 60 (2)         |       | 49 (12)        | 6  | 70 (3)           |       | 68 (23)        |    |        |      |         |
| Vogiatzis, 1999 [20]                   | MICC + MICW + Education                                           | Usual care                           |                           | 60 | 64 (1)         | 38:22 | 55 (3)         | 15 | 56 (3)           | 32:28 | 55 (5)         |    |        |      |         |
| Wen, 2008 [21]                         | MICW                                                              | Usual care                           | HICC                      | 15 | 67 (7)         | 14:1  | 46 (10)        | 9  | 66 (10)          | 9:0   | 52 (14)        | 17 | 68 (7) | 17:0 | 50 (14) |
| Wadell, 2004 [22]                      | Callisthenics                                                     | Usual care                           | Water based Callisthenics | 14 | 65 (7)         | 5:10  | 53 (12)        | 12 | 63 (7)           | 7:6   | 49 (12)        | 15 | 65 (4) | 4:11 | 56 (11) |
| Bernard, 1999 [23]                     | HICC + Breathing retraining                                       | HICC + ULRT + LLRT                   |                           | 15 | 67 (9)         | 11:4  | 39 (12)        | 21 | 64 (7)           | 17:4  | 45 (15)        |    |        |      |         |
| Bianchi, 2002 [24]                     | MICC + ULRT + LLRT + Education                                    | MICC + ULRT + LLRT + Education + NIV |                           | 10 | 65 (61-69)     | 10:0  | 40 (12)        | 9  | 64 (61-67)       | 9:0   | 48 (19)        |    |        |      |         |
| Blanco, 2013 [25]                      | HIIC + ULRT                                                       | HIIC + ULRT + sildenafil             |                           | 31 | 65 (8)         | 26:5  | 31 (10)        | 29 | 66 (8)           | 28:1  | 33 (12)        |    |        |      |         |



|                             |                                                                |                                                                                  |    |         |       |         |    |         |         |         |
|-----------------------------|----------------------------------------------------------------|----------------------------------------------------------------------------------|----|---------|-------|---------|----|---------|---------|---------|
| Borghi-Silva, 2010 [26]     | HICW + NIV                                                     | HICW + oxygen                                                                    | 14 | 68 (9)  | 9:5   | 34 (10) | 14 | 67 (7)  | 9:5     | 33 (7)  |
| Broekhuizen, 2005 [27]      | MICC + MICW + swimming                                         | MICC + MICW + swimming + PUFA                                                    | 32 | 62 (8)  | 35:16 | 36 (15) | 31 | 64 (10) | 36:15   | 38 (15) |
| Bronstad, 2013 [28]         | HICW                                                           | MICW                                                                             | 10 | 65 (8)  | 7:3   | 55 (9)  | 7  | 65 (5)  | 5:2     | 50 (15) |
| Burdet, 1997 [29]           | Moderate intensity exercise, modality unclear                  | Moderate intensity exercise, modality unclear + growth hormone                   | 8  | 65 (8)  | 7:1   | 42 (12) | 8  | 7:1     | 67 (10) | 37 (15) |
| Carrieri-Kohlman, 1996 [30] | MICW                                                           | MICW + coaching                                                                  | 27 | 66 (9)  | 15:12 | 36 (10) | 24 | 68 (7)  | 14:10   | 40 (11) |
| Costes, 2003 [31]           | MICC                                                           | MICC + NIV                                                                       | 7  | 67 (6)  | 6:1   | 32 (7)  | 7  | 5:2     | 60 (7)  | 31 (12) |
| Creutzberg, 2003 [32]       | MICC + MICW + swimming                                         | MICC + MICW + swimming + anabolic steroids                                       | 28 | 67 (7)  | 28:0  | 33 (10) | 28 | 28:0    | 66 (8)  | 38 (17) |
| Coppoolse, 1999 [33]        | HICC + Callisthenics + Education                               | HIIC + Callisthenics + Education                                                 | 10 | 67 (3)  | 10:0  | 37 (18) | 9  | 63 (8)  | 9:0     | 36 (10) |
| Dekhuijzen, 1991[34]        | MICC + MICW + Callisthenics + Education + Breathing retraining | MICC + MICW + Callisthenics + Education + Breathing retraining + IMT             | 20 | 60 (7)  | 16:4  | 52 (17) | 20 | 14:6    | 58 (8)  | 47 (14) |
| Delussu, 2014a [35]         | Moderate intensity exercise, modality unclear                  | Moderate intensity exercise, modality unclear + resistance training, unspecified | 35 | 71 (9)  | 14:21 | 61 (14) | 30 | 18:12   | 74 (6)  | 59 (18) |
| Emtner, 2003 [36]           | HICC + Education                                               | HICC + Education + oxygen                                                        | 15 | 67 (10) | 10:5  | 38 (8)  | 14 | 8:6     | 66 (7)  | 35 (10) |

|                       |                                                           |                                                                              |    |         |      |         |    |         |         |         |
|-----------------------|-----------------------------------------------------------|------------------------------------------------------------------------------|----|---------|------|---------|----|---------|---------|---------|
| Eves, 2009 [37]       | MICC + LIW + resistance training, unspecified + Education | MICC + LIW + resistance training, unspecified + Education + Helium-hyperoxia | 19 | 66 (7)  | 12:7 |         | 19 | 12:7    | 65 (9)  |         |
| Ferreira, 1998 [38]   | HICC                                                      | HICC + anabolic steroids                                                     | 7  | 66 (7)  | 7:0  | 49 (16) | 10 | 10:0    | 70 (5)  | 41 (14) |
| Fichter, 1999 [39]    | HICC                                                      | HICC + oxygen                                                                | 5  | 59 (7)  | 5:0  | 46 (27) | 5  | 5:0     | 58 (11) | 41 (8)  |
| Fuld, 2005 [40]       | MICC + Callisthenics + Education                          | MICC + Callisthenics + Education + creatine                                  | 11 | 64 (10) | 13:7 | 45 (16) | 14 | 10:8    | 62 (8)  | 45 (14) |
| Hornikx, 2012 [41]    | HICC + HICW + ULRT + LLRT + arm cycling + stair climbing  | HICC + HICW + ULRT + LLRT + arm cycling + stair climbing + vitamin D         | 25 | 69 (6)  | 19:6 | 40 (10) | 24 | 67 (8)  | 19:6    | 47 (18) |
| Mador, 2005 [42]      | MICC + MICW + Education + Callisthenics                   | MICC + MICW + Education + Callisthenics + IMT                                | 14 | 71 (8)  |      | 44 (13) | 15 | 70 (8)  |         | 45 (21) |
| Mador, 2009 [43]      | HIIC + HIIW + Education                                   | MICC + HICW + Education                                                      | 21 | 72 (7)  |      | 45 (14) | 20 | 72 (8)  |         | 42 (13) |
| Miki, 2013 [44]       | HIIC + Education                                          | HIIC + Education + Ghrelin                                                   | 10 | 73 (6)  | 9:1  | 33 (11) | 10 | 71 (6)  | 10:0    | 32 (9)  |
| Normandin, 2002 [45]  | HICC + HICW + Education                                   | Callisthenics + ULRT + Education                                             | 20 | 69 (7)  | 11:9 | 43 (16) | 20 | 67 (9)  | 10:10   | 56 (20) |
| Reuveny, 2005 [46]    | MICW                                                      | MICW + NIV                                                                   | 10 | 63 (9)  | 9:1  | 33 (9)  | 9  | 64 (9)  | 9:0     | 32 (4)  |
| Rodriguez, 2016 [47]  | HIIC                                                      | HICC                                                                         | 14 | 67 (9)  | 13:1 | 43 (15) | 15 | 66 (7)  | 14:1    | 41 (10) |
| Rooyackers, 2003 [48] | HIIC + resistance training, unspecified + Education       | HIIC + resistance training, unspecified + Education + Eccentric cycling      | 12 | 59 (13) | 10:2 | 38 (11) | 12 | 59 (10) | 10:2    | 45 (13) |

|                       |                         |                                |                         |    |         |       |         |    |         |      |         |    |        |     |         |
|-----------------------|-------------------------|--------------------------------|-------------------------|----|---------|-------|---------|----|---------|------|---------|----|--------|-----|---------|
| Scorsone, 2010 [49]   | HICC                    | HICC + oxygen                  | HICC + Helium hyperoxia | 10 | 68 (7)  | 7:3   | 50 (12) | 10 | 67 (9)  | 7:3  | 47 (10) | 10 | 67 (9) | 9:1 | 49 (12) |
| Sivori, 1998 [50]     | HICC                    | HICC + ULRT                    |                         | 14 | 63 (9)  | 12:2  | 35 (17) | 14 | 66 (9)  | 11:3 | 37 (11) |    |        |     |         |
| Spielmanns, 2015 [51] | HICC                    | HICC + oxygen                  |                         | 17 | 64 (8)  |       | 43 (12) | 19 | 64 (8)  |      | 44 (10) |    |        |     |         |
| Sykes, 2005 [52]      | HICC + ULRT + Education | HICC + ULRT + Education + IMT  |                         | 17 | 73 (7)  | 14:3  | 44 (12) | 20 | 73 (7)  | 17:3 | 40 (13) |    |        |     |         |
| Vallet, 1997 [53]     | HIIC + Education        | MIIC + Education               |                         | 12 | 55 (3)  | 8:4   | 54      | 12 | 59 (3)  | 10:2 | 63      |    |        |     |         |
| Varga, 2007 [54]      | HICC                    | HIIC                           |                         | 22 | 61 (12) | 19:3  | 51 (16) | 17 | 67 (10) | 11:6 | 64 (29) |    |        |     |         |
| Vogiatzis, 2002 [55]  | HIIC + Education        | MICC + Education               |                         | 18 | 67 (2)  | 14:4  | 45 (4)  | 18 | 69 (2)  | 16:2 | 44 (4)  |    |        |     |         |
| Vogiatzis, 2005 [56]  | HIIC + Education        | HICC + Education               |                         | 10 | 64 (9)  | 8:2   | 44 (19) | 9  | 67 (6)  | 8:1  | 39 (18) |    |        |     |         |
| Vonbank, 2012 [57]    | HICC + Education        | HICC + ULRT + LLRT + Education |                         | 12 | 62 (5)  | 8:4   | 58 (19) | 12 | 59 (8)  | 9:3  | 51 (20) |    |        |     |         |
| Wang, 2017 [58]       | HICC                    | LIW                            | HICC + IMT              | 27 | 70 (6)  |       | 51 (18) | 26 | 70 (6)  |      | 58 (19) | 28 | 71 (5) |     | 50 (16) |
| Wanke, 1994 [59]      | HICC                    | HICC + IMT                     |                         | 21 | 57 (6)  | 10:11 | 48 (17) | 21 | 55 (5)  | 12:9 | 44 (19) |    |        |     |         |

236 HIIC: High intensity interval cycling, HIIV: High intensity interval walking, HICC: High intensity continuous cycling, HICW: High intensity continuous walking,  
 237 MIIC: Moderate intensity interval cycling, MICC: Moderate intensity continuous cycling, MICW: Moderate intensity continuous walking, LIW: Low intensity  
 238 walking, PUFA: polyunsaturated fatty acids, IMT: inspiratory muscle training, ULRT: upper limb resistance training, LLRT: lower limb resistance training

239 **eTable 2** – Bias assessment for randomised controlled trials

240

| Study                         | Random sequence generation (selection bias) | Allocation concealment (selection bias) | Blinding of participants and personnel (performance bias) | Blinding of outcome assessment (detection bias) | Incomplete outcome data (attrition bias) | Selective outcome reporting (reporting bias) | Other bias |
|-------------------------------|---------------------------------------------|-----------------------------------------|-----------------------------------------------------------|-------------------------------------------------|------------------------------------------|----------------------------------------------|------------|
| Baumann (2012) [2]            | Low                                         | Unclear                                 | High                                                      | Low                                             | Low                                      | Low                                          | Low        |
| Borghesi-Silva (2009) [3]     | Unclear                                     | Unclear                                 | High                                                      | Unclear                                         | High                                     | Low                                          | Low        |
| Borghesi-Silva (2015) [4]     | Low                                         | Low                                     | High                                                      | Low                                             | Low                                      | Low                                          | Low        |
| Duruturk (2016) [5]           | Low                                         | Low                                     | High                                                      | Low                                             | Low                                      | Low                                          | Low        |
| Emery (1998) [6]              | Low                                         | Low                                     | High                                                      | Low                                             | Low                                      | Low                                          | Low        |
| Gohl (2006) [7]               | Low                                         | Unclear                                 | High                                                      | Unclear                                         | High                                     | Low                                          | Low        |
| Lake (1990) [8]               | Unclear                                     | Unclear                                 | High                                                      | Unclear                                         | Low                                      | Low                                          | Low        |
| Larson (1999) [9]             | Unclear                                     | Unclear                                 | High                                                      | Low                                             | Unclear                                  | Low                                          | Low        |
| Reardon (1994) [10]           | Low                                         | Unclear                                 | High                                                      | Low                                             | Unclear                                  | Low                                          | Low        |
| Ries (1995) [11]              | Low                                         | Low                                     | High                                                      | Unclear                                         | Low                                      | Low                                          | Low        |
| Troosters (2000) [12]         | Low                                         | Low                                     | High                                                      | Unclear                                         | Low                                      | Low                                          | Low        |
| Wijkstra (1996) [13]          | Unclear                                     | Unclear                                 | High                                                      | Unclear                                         | Low                                      | Low                                          | Low        |
| Zamboni-Ferraresi (2015) [14] | Unclear                                     | Low                                     | High                                                      | Low                                             | Low                                      | Low                                          | Low        |
| Bernard (1999)                | Unclear                                     | Unclear                                 | High                                                      | Unclear                                         | Low                                      | Low                                          | Low        |
| Bianchi (2002)                | Unclear                                     | Unclear                                 | High                                                      | High                                            | High                                     | Low                                          | Low        |
| Blanco (2013)                 | Unclear                                     | Low                                     | Low                                                       | Low                                             | Low                                      | Low                                          | Low        |
| Borghesi-Silva (2010)         | Low                                         | Low                                     | High                                                      | Unclear                                         | Low                                      | Low                                          | Low        |
| Broekhuizen (2005)            | Unclear                                     | Unclear                                 | Low                                                       | Low                                             | Low                                      | Low                                          | Low        |
| Bronstad (2013)               | Low                                         | Unclear                                 | High                                                      | Unclear                                         | High                                     | Low                                          | Low        |
| Burdet (1997)                 | Unclear                                     | Unclear                                 | Low                                                       | Low                                             | Unclear                                  | Low                                          | Low        |
| Carrieri-Kohlman (1996)       | Unclear                                     | Unclear                                 | High                                                      | Unclear                                         | Low                                      | Low                                          | Low        |
| Coppoolse (1999)              | Low                                         | Unclear                                 | High                                                      | Unclear                                         | Low                                      | Low                                          | Low        |
| Costes (2003)                 | High                                        | High                                    | High                                                      | Unclear                                         | Low                                      | Low                                          | Low        |
| Covey (2014)                  | Low                                         | Low                                     | Low                                                       | Low                                             | Low                                      | Low                                          | Low        |
| Creutzberg (2003)             | Unclear                                     | Low                                     | Low                                                       | Low                                             | Low                                      | Low                                          | Low        |
| Dekhuijzen (1991)             | Unclear                                     | Unclear                                 | High                                                      | Unclear                                         | Low                                      | Low                                          | Low        |
| Delussu (2014)                | Unclear                                     | Unclear                                 | High                                                      | Unclear                                         | Unclear                                  | Low                                          | Low        |
| Emtner (2003)                 | Unclear                                     | Unclear                                 | Low                                                       | Low                                             | Low                                      | Low                                          | Low        |
| Eves (2009)                   | Low                                         | Low                                     | Low                                                       | Low                                             | High                                     | Low                                          | Low        |
| Ferreira (1998)               | Unclear                                     | Unclear                                 | Low                                                       | Low                                             | High                                     | Low                                          | Low        |
| Fichter (1999)                | Unclear                                     | Unclear                                 | Low                                                       | Unclear                                         | Low                                      | Low                                          | Low        |
| Fuld (2005)                   | Unclear                                     | Unclear                                 | Low                                                       | Low                                             | High                                     | Low                                          | Low        |
| Hornikx (2012)                | Low                                         | Low                                     | Low                                                       | Low                                             | Low                                      | Low                                          | Low        |
| Larson (1999)                 | Unclear                                     | Unclear                                 | High                                                      | Low                                             | High                                     | Low                                          | Low        |
| Mador (2005)                  | Unclear                                     | Unclear                                 | High                                                      | Unclear                                         | Low                                      | Low                                          | Low        |
| Mador (2009)                  | Unclear                                     | Low                                     | High                                                      | Unclear                                         | Low                                      | Low                                          | Low        |
| Miki (2013)                   | Low                                         | Low                                     | Low                                                       | Low                                             | Low                                      | Low                                          | Low        |
| Normandin (2002)              | Unclear                                     | Unclear                                 | High                                                      | High                                            | Low                                      | Low                                          | Low        |

|                   |         |         |      |         |         |      |      |
|-------------------|---------|---------|------|---------|---------|------|------|
| Reuveny (2005)    | Low     | Low     | High | Low     | Low     | Low  | Low  |
| Rooyackers (2003) | Unclear | Unclear | High | Unclear | Unclear | Low  | Low  |
| Santos (2015)     | Low     | Low     | High | High    | Low     | Low  | Low  |
| Scorsone (2010)   | Unclear | Unclear | Low  | Low     | Low     | Low  | Low  |
| Sivori (1998)     | Low     | Unclear | High | Unclear | High    | Low  | Low  |
| Spielmanns (2015) | Low     | Unclear | Low  | High    | High    | Low  | Low  |
| Sykes (2005)      | Unclear | Low     | High | Low     | Low     | Low  | Low  |
| Vallet (1997)     | Unclear | Unclear | Low  | Low     | Low     | Low  | Low  |
| Vogiatzis (2002)  | Unclear | Unclear | High | Unclear | Low     | Low  | Low  |
| Vogiatzis (2005)  | Unclear | Unclear | High | Unclear | Unclear | Low  | Low  |
| Vonbank (2012)    | Unclear | Unclear | High | Unclear | Low     | Low  | Low  |
| Wanke (1994)      | Unclear | Unclear | High | Unclear | High    | Low  | Low  |
| Wen (2008)        | Low     | Unclear | High | Unclear | High    | Low  | Low  |
| Wang (2017)       | Low     | Low     | High | Low     | Low     | Low  | Low  |
| Proportion: Low   | 40%     | 35%     | 29%  | 46%     | 65%     | 100% | 100% |
| High              | 2%      | 2%      | 71%  | 8%      | 23%     | 0%   | 0%   |
| Unclear           | 58%     | 63%     | 0%   | 46%     | 12%     | 0%   | 0%   |

241

242

243

244 **eFigure 1** – Network graph of programme components (model 1). : Resistance training, AExT: Traditional lower limb aerobic training, ECC: Eccentric cycling, IMT: Inspiratory muscle training, PUFA: polyunsaturated fatty acids, UC: Usual care. The size of the nodes is proportional to the number of included studies and the thickness of the lines is proportional to the number of comparisons.

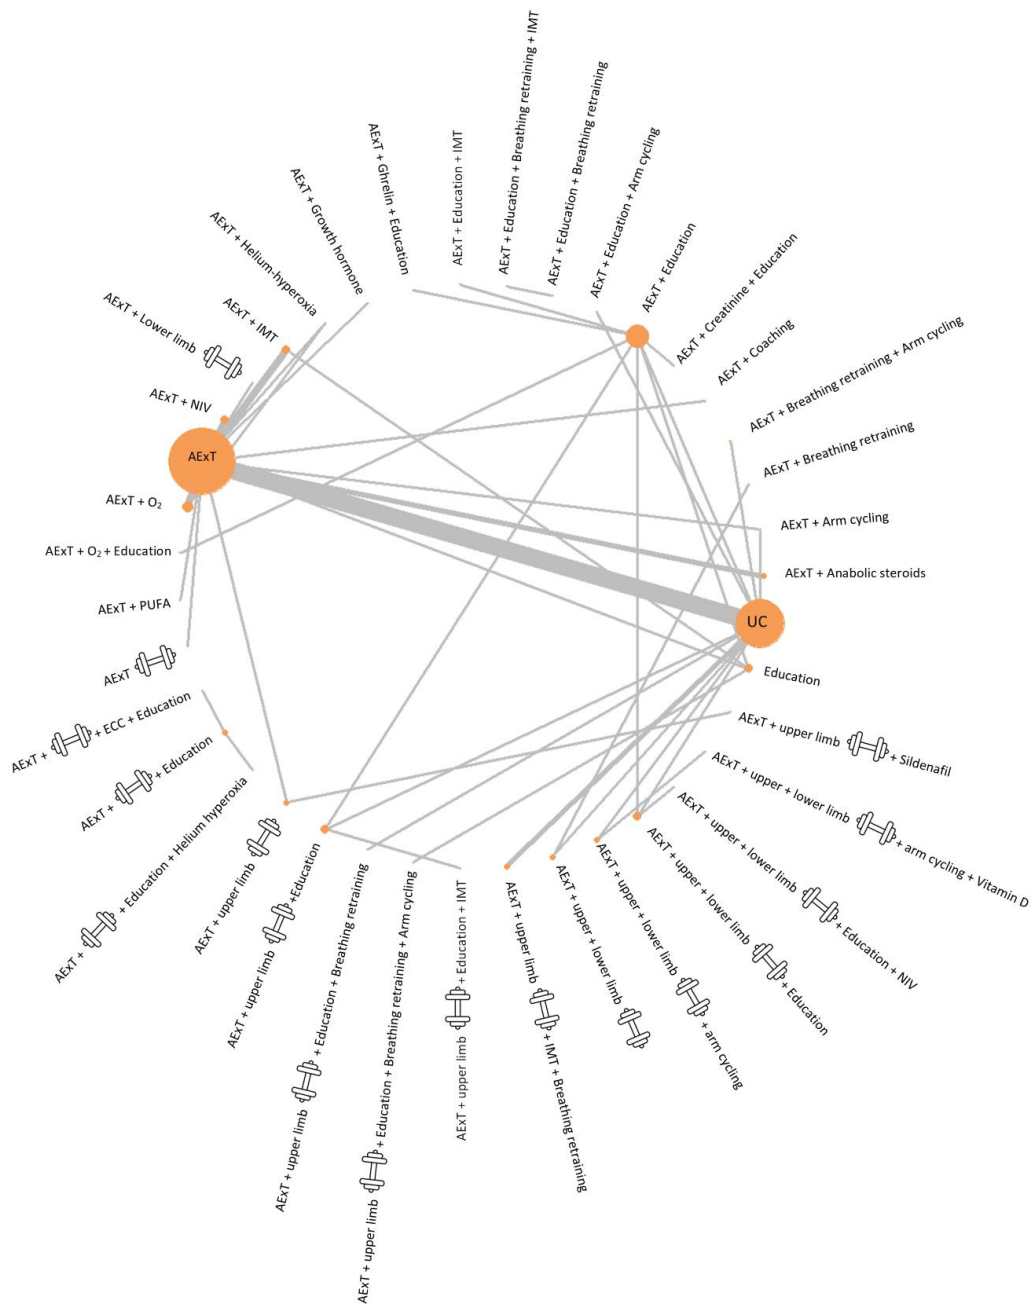

250 **eFigure 2** – Net heat plot of model 1 once unconnected studies removed.

251 In this plot, the area of a grey square displays the contribution of the direct estimate of one design in  
 252 the column to a network estimate in a row. The colours show the change in inconsistency when  
 253 relaxing the assumption of consistency for the effects of single designs. The colours on the diagonal  
 254 represent the inconsistency contribution of the corresponding design. The colours on the off-  
 255 diagonal are associated with the change in inconsistency between direct and indirect evidence in a  
 256 network estimate in the row after relaxing the consistency assumption for the effect of one design in  
 257 the column. Cool colours (blue) indicate an increase and warm colours (yellow to orange to red) a  
 258 decrease, colours in between (yellow) indicate no change: the stronger the intensity of the colour,  
 259 the greater the difference between the inconsistency before and after the detachment.

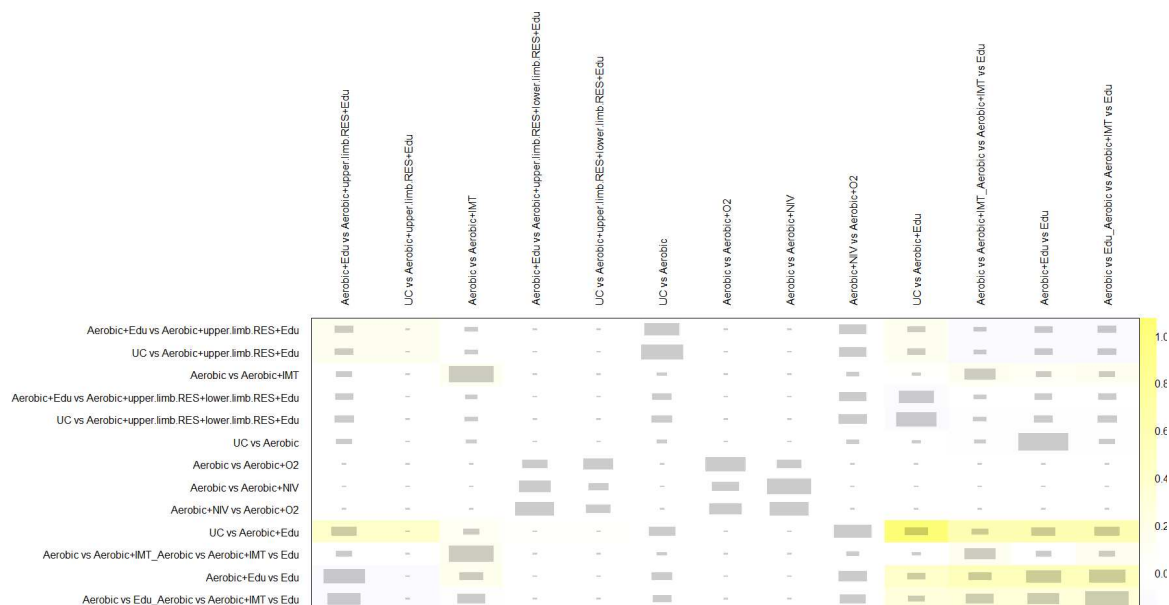

260

261



262 **eFigure 3** – Net heat plot of model 2 once unconnected studies removed.

263 In this plot, the area of a grey square displays the contribution of the direct estimate of one design in  
 264 the column to a network estimate in a row. The colours show the change in inconsistency when  
 265 relaxing the assumption of consistency for the effects of single designs. The colours on the diagonal  
 266 represent the inconsistency contribution of the corresponding design. The colours on the off-  
 267 diagonal are associated with the change in inconsistency between direct and indirect evidence in a  
 268 network estimate in the row after relaxing the consistency assumption for the effect of one design in  
 269 the column. Cool colours (blue) indicate an increase and warm colours (yellow to orange to red) a  
 270 decrease: the stronger the intensity of the colour, the greater the difference between the  
 271 inconsistency before and after the detachment (yellow represents a low intensity of red i.e. mild  
 272 inconsistency).

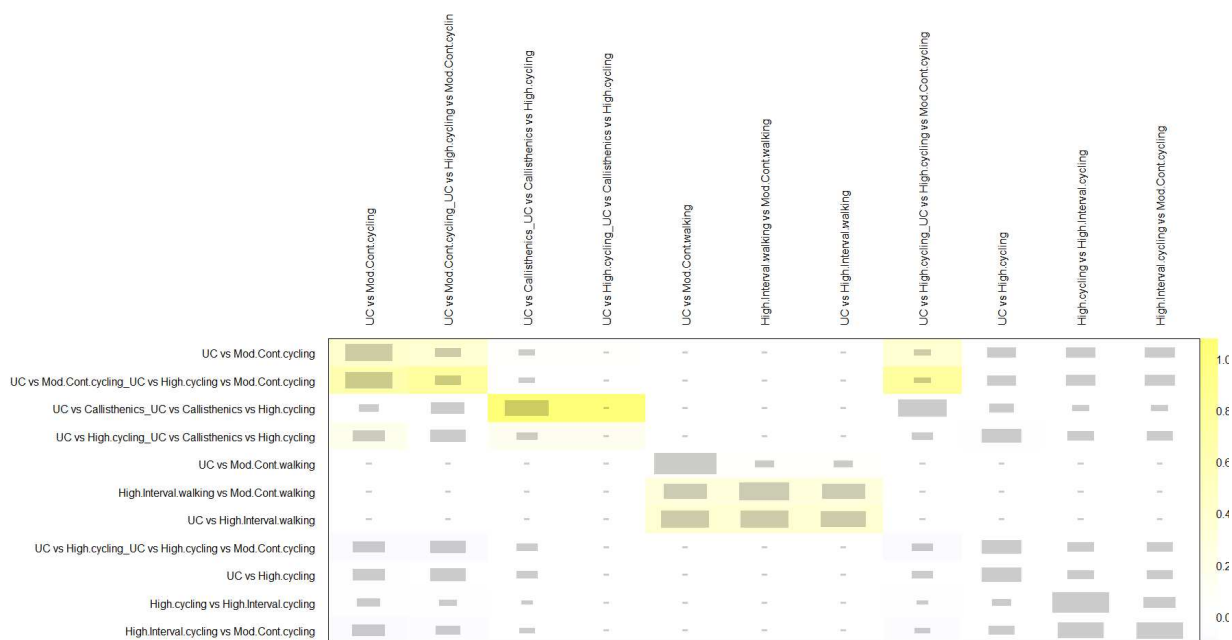

273

274
